# Supplementary material for: Effect of zero-time exercise intervention on endometrial receptivity in women with thin endometrium a single-center randomized sham-controlled trial
Source: Arch Gynecol Obstet. 2026 Mar 16;313(1):129. doi: 10.1007/s00404-026-08385-4 (PMC12992412; doi:10.1007/s00404-026-08385-4)
Supplement: Supplementary file 1 — Supplementary file1 (XLSX 10 KB) [file 404_2026_8385_MOESM1_ESM.xlsx]

## Sheet: RPE
		Rating of Perceived Exertion (RPE) Scale
		Score	Subjective Sensation	Visual Emoji Reference
		6	No effort at all	😰
		7	very ,very light	😎
		8
		9	very light	😜
		10
		11	fairy light	😉
		12
		13	somewhat hard	😆
		14
		15	hard	😣
		16
		17	very hard	😩
		18
		19	very very hard	😫
		20	Exhausted	😤
